# Supplementary material for: A De Novo Noncoding RARB Variant Associated with Complex Microphthalmia Alters a Putative Regulatory Element
Source: Hindawi journal article supplement (doi:10.1155/2024/6619280), 2024-01-27

## SUPPLEMENTARY MATERIALS

**Supplemental Table 1.** Rare variants identified by exome and genome sequencing.

| Position                                                 | Gene                          | Variant                          | WES Reads | WGS Reads    | Inheritance           | CADD score   | REVEL score | gnomAD v3        | OMIM phenotype                                   |
|----------------------------------------------------------|-------------------------------|----------------------------------|-----------|--------------|-----------------------|--------------|-------------|------------------|--------------------------------------------------|
| Variants identified by trio exome sequencing             |                               |                                  |           |              |                       |              |             |                  |                                                  |
| 12:118582499                                             | PEBP1<br>(NM_002567.4)        | c.455C>T<br>p.(Ala152Val)        | 13/33     | 15/26        | <i>De novo</i>        | 22.3         | 0.094       | 2/152,114        | None                                             |
| 1:44057557                                               | PTPRF<br>(NM_002840.5)        | c.1606C>G<br>p.(Pro536Ala)       | 45/85     | 14/29        | CH:<br>Maternal       | 19.47        | 0.117       | 68/152,160       | ? Athelia (AR PTC)                               |
| 1:44058233                                               | PTPRF<br>(NM_002840.5)        | c.1774G>A<br>p.(Val592Ile)       | 64/112    | 10/20        | CH:<br>Paternal       | 24.2         | 0.102       | 134/152,038      | ? Athelia (AR PTC)                               |
| 1:44087628                                               | PTPRF<br>(NM_002840.5)        | c.5678G>A<br>p.(Arg1893His)      | 75/155    | 16/32        | CH:<br>Paternal       | 27.4         | 0.613       | 101/152,166      | ? Athelia (AR PTC)                               |
| X:72673444                                               | CDX4<br>(NM_005193.2)         | c.596_598delCCA<br>p.(Thr199del) | 18/18     | 20/20        | XL:<br>Maternal       | 18.41        | NA          | 1/111,611        | None                                             |
| X:138286342                                              | FGF13<br>(NM_001139500.2)     | c.-73A>T                         | 64/64     | 17/17        | XL:<br>Maternal       | 21.3         | NA          | 7/111,060        | Seizures and global delay (XLR MIS)              |
| Additional variants identified by trio genome sequencing |                               |                                  |           |              |                       |              |             |                  |                                                  |
| <b>3:25472274</b>                                        | <b>RARB<br/>(NM_000965.4)</b> | <b>c.157+1895G&gt;A</b>          | -         | <b>14/29</b> | <b><i>De novo</i></b> | <b>18.75</b> | <b>NA</b>   | <b>1/152,134</b> | <b>Syndromic microphthalmia (AD MIS; AR PTC)</b> |
| 11:100830655                                             | ARHGAP42<br>(NM_152432.4)     | c.1204A>G<br>p.(Ile402Val)       | -         | 9/13         | CH:<br>Maternal       | 25.4         | 0.279       | 1/152,154        | None                                             |
| 11:100763695                                             | ARHGAP42<br>(NM_152432.4)     | c.385-20488A>G                   | -         | 22/43        | CH:<br>Paternal       | 17.75        | NA          | NP               | None                                             |
| 2:160042312                                              | TANC1<br>(NM_033394.3)        | c.2521G>A<br>p.(Ala841Thr)       | -         | 12/33        | CH:<br>Maternal       | 22.4         | 0.307       | 15/152,152       | None                                             |
| 2:159955772                                              | TANC1<br>(NM_033394.3)        | c.259+1426A>G                    | -         | 7/18         | CH:<br>Paternal       | 21.4         | NA          | 117/152,156      | None                                             |
| X:129507168                                              | SLC25A14<br>(NM_001282195.2)  | c.*244A>T                        | -         | 14/14        | Maternal              | 15.56        | NA          | 1/112,015        | None                                             |

Filtered for read depth >10, CADD (v1.4) score >15, at least one coding variant for compound heterozygous, and frequency in gnomAD v2 or v3 of <0.001 MAF and <3 homozygotes for recessive or <5 alleles for de novo and X-linked; Intergenic variants and low quality/messy regions excluded. AD, autosomal dominant; AR, autosomal recessive; MIS, missense; PTC, premature truncation.

**Supplemental Table 2.** List of primers and sequences used in this study.

| Sequencing                                                                               | Forward                                                                                                                                                                                                                                                                                                                                                                                                                                                                                                                                                                                                                                                                                                                                                                               | Reverse                        | Product |
|------------------------------------------------------------------------------------------|---------------------------------------------------------------------------------------------------------------------------------------------------------------------------------------------------------------------------------------------------------------------------------------------------------------------------------------------------------------------------------------------------------------------------------------------------------------------------------------------------------------------------------------------------------------------------------------------------------------------------------------------------------------------------------------------------------------------------------------------------------------------------------------|--------------------------------|---------|
| h <i>RARB</i> Seq_Fwd6/Rev5                                                              | GGAGAGCGAGCGGTGAATGT                                                                                                                                                                                                                                                                                                                                                                                                                                                                                                                                                                                                                                                                                                                                                                  | AAGTTGGGGTGTGGGATTCA           | 227     |
| Minigene design                                                                          | Forward                                                                                                                                                                                                                                                                                                                                                                                                                                                                                                                                                                                                                                                                                                                                                                               | Reverse                        | Product |
| h <i>RARB</i> Exon1_Intron1                                                              | CATGGCGGCCGCAAGGGAGATCATGTTGACTGTAT                                                                                                                                                                                                                                                                                                                                                                                                                                                                                                                                                                                                                                                                                                                                                   | CATGTCTAGATGAACCAAACACTGCATGGC | 2301    |
| h <i>RARB</i> Intron1_Exon2                                                              | CATGTCTAGAGTTAAGTGAGCAACAAGGTCA                                                                                                                                                                                                                                                                                                                                                                                                                                                                                                                                                                                                                                                                                                                                                       | ATATGGGCCCTTACATCCCTCACAGGCG   | 584     |
| T7                                                                                       | TAATACGACTCACTATAGGG                                                                                                                                                                                                                                                                                                                                                                                                                                                                                                                                                                                                                                                                                                                                                                  |                                |         |
| <i>RARB</i>                                                                              | AAGGGAGATCATGTTGACTGTAT                                                                                                                                                                                                                                                                                                                                                                                                                                                                                                                                                                                                                                                                                                                                                               | CTTACATCCCTCACAGGCG            | 316     |
| <i>GAPDH</i>                                                                             | CCAAGGTCATCCATGACAAC                                                                                                                                                                                                                                                                                                                                                                                                                                                                                                                                                                                                                                                                                                                                                                  | GAGGCAGGGATGATGTTCTG           | 148     |
| RT-qPCR                                                                                  | Forward                                                                                                                                                                                                                                                                                                                                                                                                                                                                                                                                                                                                                                                                                                                                                                               | Reverse                        | Product |
| Target Gene                                                                              | Forward                                                                                                                                                                                                                                                                                                                                                                                                                                                                                                                                                                                                                                                                                                                                                                               | Reverse                        | Product |
| <i>RARB</i>                                                                              | AAGGGAGATCATGTTGACTGTAT                                                                                                                                                                                                                                                                                                                                                                                                                                                                                                                                                                                                                                                                                                                                                               | CTTACATCCCTCACAGGCG            | 316     |
| <i>PITX2</i>                                                                             | ACATGTCCACACGCGAAGAA                                                                                                                                                                                                                                                                                                                                                                                                                                                                                                                                                                                                                                                                                                                                                                  | GGTACATGTCGTCGTAGGGC           | 183     |
| <i>FOXC1</i>                                                                             | TTCGAGTCACAGAGGATCGG                                                                                                                                                                                                                                                                                                                                                                                                                                                                                                                                                                                                                                                                                                                                                                  | CGGCTTTGAGGGTGTGTCAA           | 148     |
| <i>RARA</i>                                                                              | GGGGGAATCCTGAATCGAGC                                                                                                                                                                                                                                                                                                                                                                                                                                                                                                                                                                                                                                                                                                                                                                  | GATGTCTCAAGAGCCGGTCC           | 234     |
| <i>RARG</i>                                                                              | CAGGTTTCCCTTCGCCTTC                                                                                                                                                                                                                                                                                                                                                                                                                                                                                                                                                                                                                                                                                                                                                                   | ATGGCTTGTAGACCCGAGGA           | 201     |
| <i>EYA2</i>                                                                              | CAACGTCCCAACCAGAGTT                                                                                                                                                                                                                                                                                                                                                                                                                                                                                                                                                                                                                                                                                                                                                                   | ACGGGTCACTGCTCCTCTTA           | 152     |
| <i>DKK2</i>                                                                              | CATCAAGTCTCTCTGGGCG                                                                                                                                                                                                                                                                                                                                                                                                                                                                                                                                                                                                                                                                                                                                                                   | GGACTGTGGCAATACCTCCC           | 168     |
| <i>WNT5A</i>                                                                             | AGTCGCCCCGAACTTATTG                                                                                                                                                                                                                                                                                                                                                                                                                                                                                                                                                                                                                                                                                                                                                                   | CTCCGAGCTCTGCCTTC              | 92      |
| <i>WNT5B</i>                                                                             | ATGGCCTACATAGGGGAGGG                                                                                                                                                                                                                                                                                                                                                                                                                                                                                                                                                                                                                                                                                                                                                                  | GTGAAGGCGGTCTCTCGG             | 146     |
| <i>CTNNB1</i>                                                                            | TACTGGCTAGTGGTGACCC                                                                                                                                                                                                                                                                                                                                                                                                                                                                                                                                                                                                                                                                                                                                                                   | AGGTGAAGTCTTAAAGCTTGC          | 166     |
| <i>AXIN2</i>                                                                             | TAACCCCTCAGAGCGATGGA                                                                                                                                                                                                                                                                                                                                                                                                                                                                                                                                                                                                                                                                                                                                                                  | AGTTCCTCTCAGCAATCGGC           | 143     |
| <i>B-ACTIN</i>                                                                           | GGACTTCGAGCAAGAGATGG                                                                                                                                                                                                                                                                                                                                                                                                                                                                                                                                                                                                                                                                                                                                                                  | AGCACTGTGTTGGCGTACAG           | 234     |
| <i>RARB</i> sequences included in reporter constructs (variant position is shown in red) |                                                                                                                                                                                                                                                                                                                                                                                                                                                                                                                                                                                                                                                                                                                                                                                       |                                | Product |
| <i>RARB</i> promoter                                                                     | GGAGCAGCGTCCCGGCTCCTCCCTGCTCATTTTAAAGCACTTCTGTATTGTTTTAAGGTGAGAAATAGGAAAGAAAACG<br>CCGGCTTGTCGCTCGCTGCCTCTCTGGCTGTCTGCTTTTGCAGGGCTGCTGGGAGTTTTTAAGCTCTGTGAGAATCCT<br>GGGAGTTGGTGATGTCAGACTAGTTGGGTCAATTGAAGGTTAGCAGCCGGGTAGGGTTCACCGAAAGTTCACCTCGCATAT<br>ATTAGGCAATCAATCTTTTCTGTGTGACAGAAGTAGTAGGAAGTGAAGTGTGAGCTGTTGAGAGGCAGGAGGGTCTATTCTTTGC<br>CAAAGGGGGGACCAGAATCCCCATGCGAGCTGTTGAGGACTGGGATGCCGAGAACGCGAGCGATCCGAGCAGGGTTT<br>GTCTGGGCACCGTCCGGGTAGGATCCGGAACGCATTCCGGAAGGCTTTTGAAGCATTACTTGAAGGAGAAGTGGGAT<br>CTTTCTGGGAACCCCCCGGCTGGATTGGCCGAGCAAGCCTGGAAAATGGTAAATGATCATTGGATCAATTACAGGC<br>TTTTAGCTGGCTGTCTGTGATAATTCATGATTCCGGGGCTGGGAAAAAGACCAACAGCCTACGTGCCAAAAAGGGGCAAG<br>GTTTGATGGAGTTGGGTGGACTTTTCTATGCCATTTGCCTCCACCTAGAGGATAAGCACTTTTGCAGACATTCAGTGCAAG<br>GGAGATC |                                | 743     |
| Putative WT element                                                                      | CATGTTTTTAAACAGAAGGAAAAAATATGCTCAGGATCCTCGCCAAAAGTTATTAGACCTAATAGAGTTTTTACATGTAGACA<br>TTCTTCTTTTGAATTAACCTTCAAAGATGCCTATTAAGTTGTAAGAGTAGGGGAAAAGCTTTGTTTGTCTTGGACAAGT<br>TAAACAAGGGATTGCTTTATCTAGGGAGAGCGGTTGAATGTGTCATTGCCTAAAACCTACCCGATAAGCAAGAAGTGT<br>TGATAACAGCAAAGTTTAGCTAATCAAAGAACTTGCATTAGACAAAAGTAAATAAAGGCATTTGACAAAGGGATTTTCAGAAA<br>TTCCAGTGTCTTATTTTGAAGCAGGGCAATTAGTTCTTATTGTGGTCAGTTTACAAGAGTTTGAATCCACACCCCAACTT<br>TAGGTTAAATGAATAAAATGTAAATAT                                                                                                                                                                                                                                                                                                                    |                                | 442     |
| Putative variant element                                                                 | CATGTTTTTAAACAGAAGGAAAAAATATGCTCAGGATCCTCGCCAAAAGTTATTAGACCTAATAGAGTTTTTACATGTAGACA<br>TTCTTCTTTTGAATTAACCTTCAAAGATGCCTATTAAGTTGTAAGAGTAGGGGAAAAGCTTTGTTTGTCTTGGACAAGT<br>TAAACAAGGGATTTGCTTTATCTAGGGAGAGCGGTTGAATGTGTCATTGCCTAAAACCTACCCGATAAGCAAGAAGTGT<br>TGATAACAGCAAAGTTTAGCTAATCAAAGAACTTGCATTAGACAAAAGTAAATAAAGGCATTTGACAAAGGGATTTTCAGAAA<br>TTCCAGTGTCTTATTTTGAAGCAGGGCAATTAGTTCTTATTGTGGTCAGTTTACAAGAGTTTGAATCCACACCCCAACTT<br>TAGGTTAAATGAATAAAATGTAAATAT                                                                                                                                                                                                                                                                                                                   |                                | 442     |

**Supplemental Table 3.** Impact predictions from Human Splicing Finder for *RARB* c.157+1895G>A.

| <b>Type</b>                       | <b>Interpretation</b>                                                                             |                                    |                          |
|-----------------------------------|---------------------------------------------------------------------------------------------------|------------------------------------|--------------------------|
| New Donor splice site             | Activation of a cryptic Donor site.<br>Potential alteration of splicing (cryptic exon activation) |                                    |                          |
| <b>Algorithm/Matrix</b>           | <b>Position</b>                                                                                   | <b>Sequences</b>                   | <b>Variation</b>         |
| HSF Donor site (matrix GT)        | chr3:25430778                                                                                     | -REF: CCAGTGTCT<br>-ALT: CCAGTaTCT | 63.69 > 80.5<br>(26.39%) |
| <b>Type</b>                       | <b>Interpretation</b>                                                                             |                                    |                          |
| Alteration of auxiliary sequences | Significant alteration of ESE / ESS motifs ratio (2)                                              |                                    |                          |
| <b>Algorithm/Matrix</b>           | <b>Position</b>                                                                                   | <b>Sequence</b>                    |                          |
| EIE (ESE Site Broken)             | chr3:25430778                                                                                     | CCAGTG                             |                          |
| Sironi_motif1 (ESS Site Broken)   | chr3:25430778                                                                                     | CCAGTGTC                           |                          |
| ESS_hnRNPA1 (ESS Site Broken)     | chr3:25430779                                                                                     | CAGTGT                             |                          |
| IIE (ESS Site Broken)             | chr3:25430779                                                                                     | CAGTGT                             |                          |
| ESE_SRp55 (ESE Site Broken)       | chr3:25430780                                                                                     | AGTGTC                             |                          |
| IIE (ESS Site Broken)             | chr3:25430781                                                                                     | GTGTCT                             |                          |
| PESS (New ESS Site)               | chr3:25430782                                                                                     | TaTCTTAT                           |                          |
| EIE (New ESE Site)                | chr3:25430783                                                                                     | aTCTTA                             |                          |

**Supplemental Figure 1.** Features of a 442-bp Conserved Region 1 (CR1). Multiz alignment demonstrates high conservation of the entire CR1 sequence across select species; dark blue indicates highly conserved and light blue less conserved nucleotides. ENCODE candidate *cis*-regulatory elements (orange rectangles) and JASPAR regions enriched in transcription factor DNA-binding sites (TFBS) (grey rectangles) are indicated based on UCSC Genome Browser. CR1 encompasses the full candidate *cis*-regulatory element E2186460/enhD (242 bp; dark orange rectangle) surrounded by 100 bp of upstream and downstream sequences (blue rectangles). Please note that *RARB* c.157+1895G>A (red box/ font) shows high conservation and falls within both the predicted *cis*-regulatory element E2186460/enhD and JASPAR TFBS- enriched region.

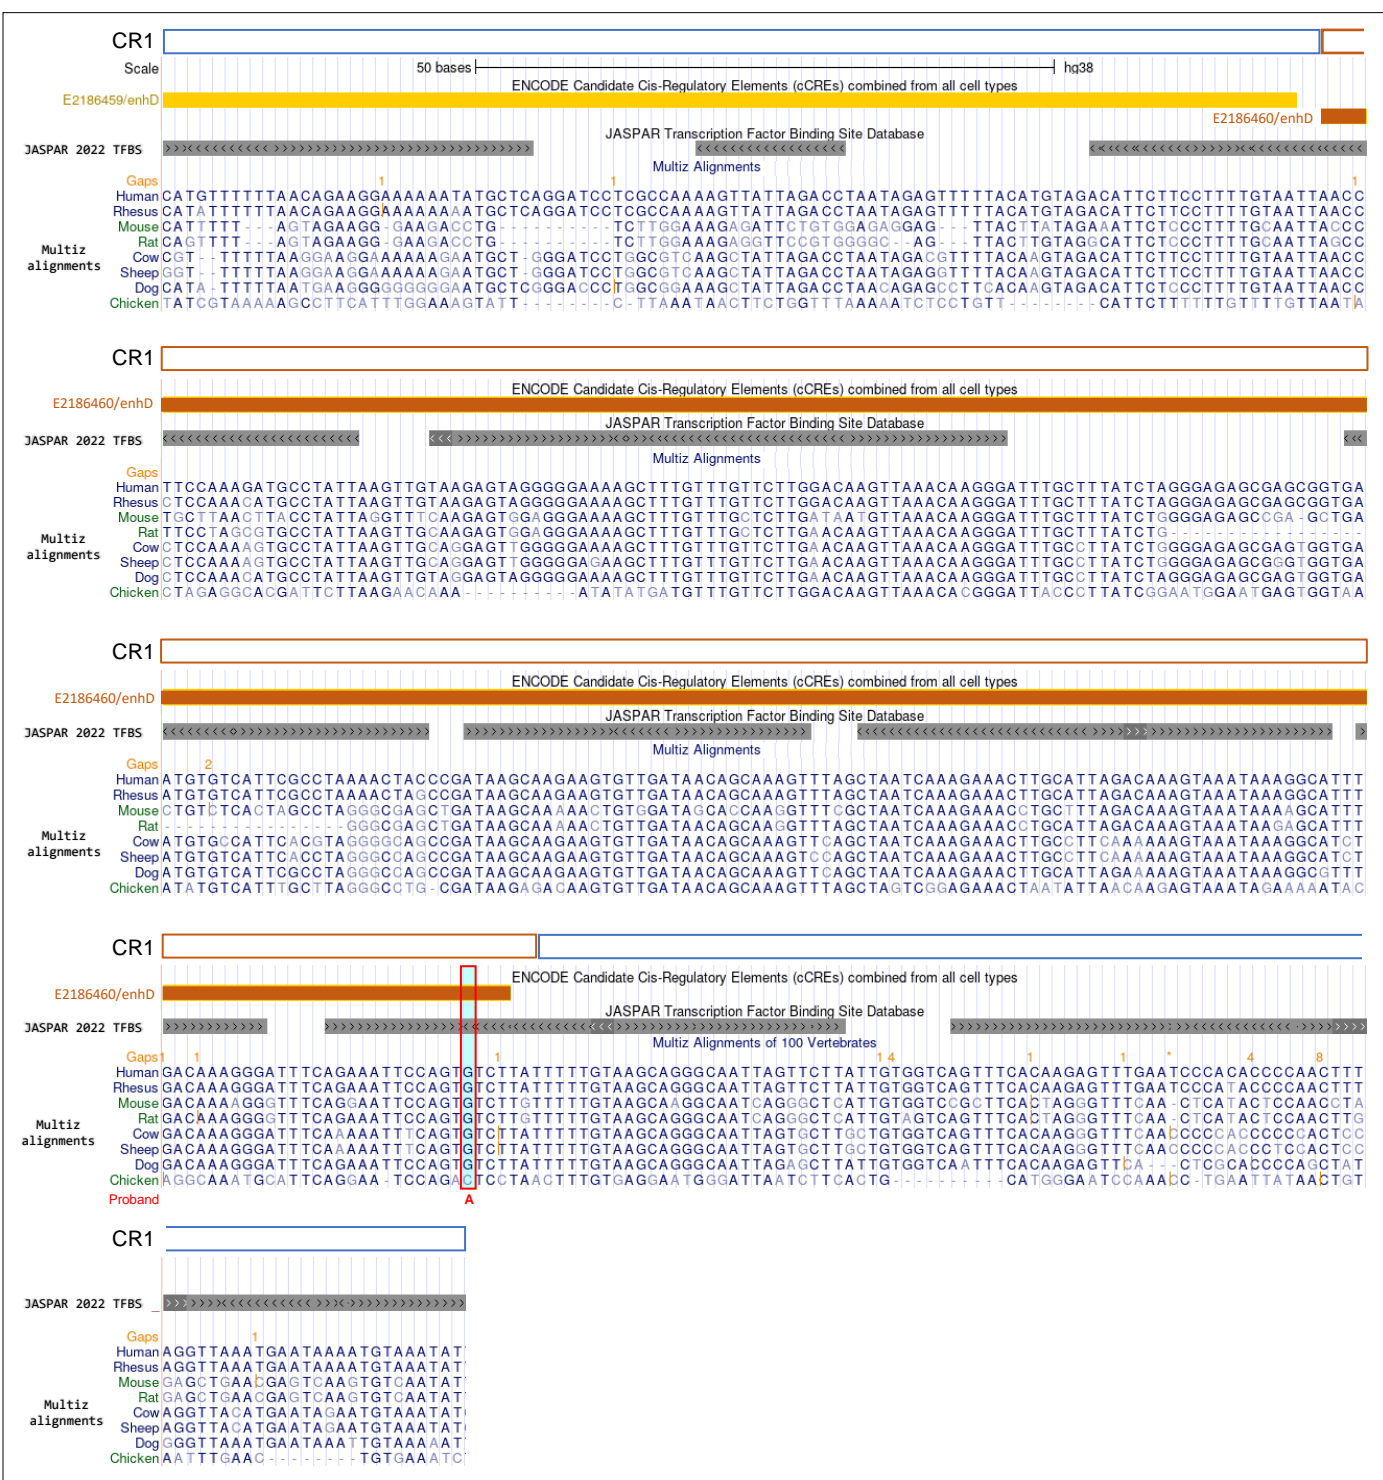

Supplement: f1 [file 6619280.f1.pdf]
